# Supplementary material
Source: PubMed Central journal article supplement (PMC6173144)
Supplement: jps-43-2-D17-089_s001.pdf [file jps-43-2-D17-089_s001.pdf]

# Journal of Pesticide Science

Supplementary materials

DOI:10.1584/jpestics.D17-089

## **Identification of the novel *hcbB* operon catalyzing the dechlorination of pentachlorophenol in the Gram-positive bacterium *Nocardioides* sp. strain PD653.**

Koji ITO, Kazuhiro TAKAGI,\* Yoshitaka MATSUSHIMA,  
Akio IWASAKI, Naoto TANAKA, Yu KANESAKI,  
Fabrice MARTIN-LAURENT and Shizunobu IGIMI

Pesticide Science Society of Japan

*<http://pssj2.jp/eng/>*

## Supplemental materials

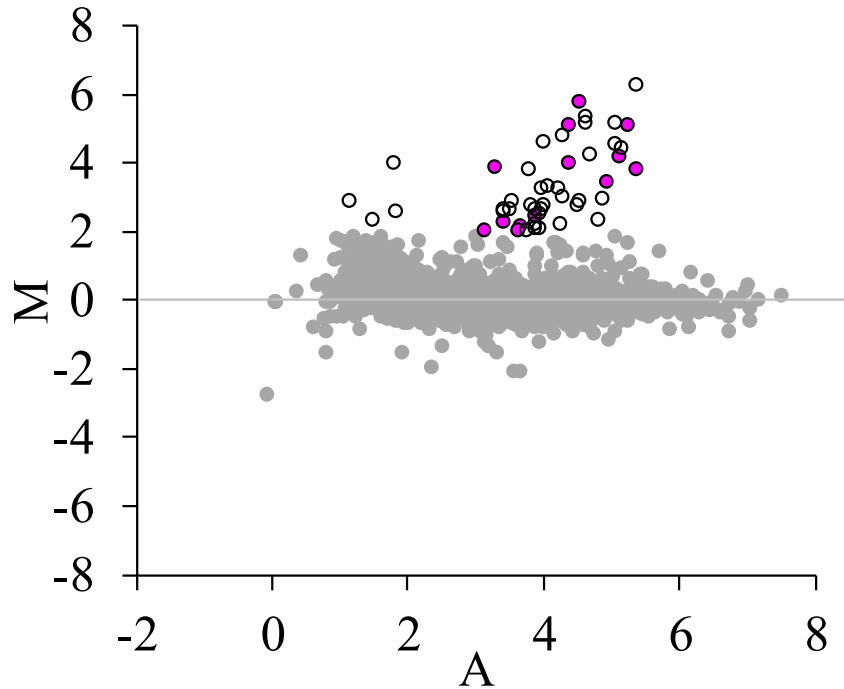

**Fig. S1 Differential expression analysis of strain PD653 cells 8 h after exposed to HCB versus untreated.** The  $\log_2$  of the ratio of fold changes of each ORF (M) is plotted against the average abundance of that ORF in (A). For each plot, M and A values were obtained from triplicate samples. Open circles indicate the genes upregulated ( $\log_2 > 2$ ) in the presence of HCB, and the gene cluster containing open reading frames (ORFs) responsible for the metabolism of PCP are plotted by magenta circles.

Table S1. Differential expression in strain PD653 during exposure to HCB. Candidate genes responsible for PCP metabolism are indicated in boldface.

| Locus tag         | Fold induction | Predicted function                                                                          | Closest related protein                                      | Identity (%) | Accession no.     | Organisms                                  |
|-------------------|----------------|---------------------------------------------------------------------------------------------|--------------------------------------------------------------|--------------|-------------------|--------------------------------------------|
| PD653_1060        | 8              | Hypothetical protein                                                                        | Hypothetical protein CF8_0913                                | 52           | EON25013.1        | <i>Nocardioides</i> sp. CF8                |
| PD653_1061        | 5              | Hypothetical protein                                                                        | NAD-dependent malic enzyme                                   | 77           | OJH68642.1        | <i>Streptomyces viridifaciens</i>          |
| PD653_1062        | 10             | SAF domain-containing protein                                                               | Pyridine nucleotide-disulfide oxidoreductase                 | 77           | WP_018155833.1    | <i>Demetria terrigena</i>                  |
| PD653_1063        | 7              | Hypothetical protein                                                                        | Hypothetical protein                                         | 66           | WP_036490206.1    | <i>Nocardioides</i> sp. CF8                |
| PD653_1064        | 7              | Type II secretion system protein E                                                          | Type II secretion system protein E                           | 69           | EON25017.1        | <i>Nocardioides</i> sp. CF8                |
| PD653_1065        | 6              | Integral membrane protein                                                                   | Integral membrane protein                                    | 68           | EON25018.1        | <i>Nocardioides</i> sp. CF8                |
| PD653_1066        | 6              | Type II secretion system protein                                                            | Type II secretion system protein                             | 73           | EON25019.1        | <i>Nocardioides</i> sp. CF8                |
| PD653_1067        | 1              | Hypothetical protein                                                                        | Hypothetical protein ASE01_16845                             | 50           | KRB75034.1        | <i>Nocardioides</i> sp. Root190            |
| PD653_1068        | 7              | TadE family protein                                                                         | TadE family protein                                          | 63           | EON25020.1        | <i>Nocardioides</i> sp. CF8                |
| PD653_1069        | 3              | Predicted transcriptional regulator                                                         | Hypothetical protein GA0115240_11986                         | 54           | SCD69461.1        | <i>Streptomyces</i> sp. DvalAA-14          |
| PD653_1070        | 1              | Flp pilus assembly protein TadG                                                             | TadE family protein                                          | 65           | EON25021.1        | <i>Nocardioides</i> sp. CF8                |
| PD653_1071        | 6              | Superoxide dismutase                                                                        | Hypothetical protein CF8_0923                                | 69           | EON25022.1        | <i>Nocardioides</i> sp. CF8                |
| PD653_1072        | 6              | Peptidoglycan-binding LysM                                                                  | Peptidoglycan-binding LysM                                   | 68           | EON25023.1        | <i>Nocardioides</i> sp. CF8                |
| PD653_1108        | 14             | GntR family transcriptional regulator                                                       | Transcriptional regulator, GntR family                       | 78           | ABL83953.1        | <i>Nocardioides</i> sp. JS614              |
| PD653_1109        | 16             | Flavin reductase domain protein FMN-binding protein                                         | Putative oxidase                                             | 61           | CND52477.1        | <i>Mycobacterium tuberculosis</i>          |
| PD653_1110        | 4              | HTH-type transcriptional regulator MalT                                                     | HTH-type transcriptional regulator MalT                      | 74           | KMO66989.1        | <i>Mycobacterium chlorophenicum</i>        |
| PD653_1111        | 1              | ATPase AAA                                                                                  |                                                              |              |                   |                                            |
| <b>PD653_1112</b> | <b>55</b>      | <b>Pyridoxine 5'-phosphate oxidase</b>                                                      | <b>Putative pyridoxine/pyridoxamine 5'-phosphate oxidase</b> | <b>65</b>    | <b>KMO83753.1</b> | <b><i>Mycobacterium chlorophenicum</i></b> |
| <b>PD653_1113</b> | <b>34</b>      | <b>Hypothetical protein</b>                                                                 | <b>Xylose isomerase-like TIM barrel</b>                      | <b>50</b>    | <b>KMO83752.1</b> | <b><i>Mycobacterium chlorophenicum</i></b> |
| <b>PD653_1114</b> | <b>11</b>      | <b>4-hydroxyphenylacetate 3-hydroxylase</b>                                                 | <b>FADH(2)-dependent monoxygenase Trd</b>                    | <b>84</b>    | <b>KMO66988.1</b> | <b><i>Mycobacterium chlorophenicum</i></b> |
| PD653_1115        | 19             | Hypothetical protein                                                                        | Cupin domain protein                                         | 74           | KMO66987.1        | <i>Mycobacterium chlorophenicum</i>        |
| PD653_1116        | 2              | Putative uncharacterized protein npdX                                                       | SnoL-like domain protein                                     | 58           | KMO66986.1        | <i>Mycobacterium chlorophenicum</i>        |
| PD653_1117        | 4              | XRE family transcriptional regulator with cupin sensor                                      | GTP-binding protein LepA                                     | 81           | KQW47527.1        | <i>Nocardioides</i> sp. Root1257           |
| PD653_1118        | 1              | Transcriptional regulator                                                                   | XRE family transcriptional regulator with cupin sensor       | 71           | CND52544.1        | <i>Mycobacterium tuberculosis</i>          |
| PD653_1119        | 5              | Transcriptional regulator, TetR family                                                      | TetR family transcriptional regulator                        | 70           | KQW53742.1        | <i>Nocardioides</i> sp. Root1257           |
| PD653_1120        | 3              | NAD(P) transhydrogenase subunit alpha                                                       | NAD(P) transhydrogenase subunit alpha                        | 73           | KQV74634.1        | <i>Aeromicrobium</i> sp. Root344           |
| PD653_1121        | 6              | NAD(P) transhydrogenase beta subunit                                                        | NAD(P) transhydrogenase subunit beta                         | 79           | SFD02090.1        | <i>Nocardioides terrae</i>                 |
| PD653_1122        | 4              | Serine/threonine protein kinase                                                             | hypothetical protein ASD11_15130                             | 34           | KQY55832.1        | <i>Aeromicrobium</i> sp. Root495           |
| PD653_1123        | 35             | Dehydrogenases with different specificities (related to short-chain alcohol dehydrogenases) | Gluconate 5-dehydrogenase                                    | 78           | KMO83627.1        | <i>Mycobacterium chlorophenicum</i>        |
| PD653_1124        | 15             | Mannose-6-phosphate isomerase                                                               |                                                              |              |                   |                                            |
| PD653_1125        | 5              | Hypothetical protein                                                                        | MULTISPECIES: LysR family transcriptional regulator          | 58           | WP_085870507.1    | <i>Nocardioides</i>                        |
| PD653_1131        | 4              | Peptidase M24                                                                               |                                                              |              |                   |                                            |
| PD653_1132        | 2              | Uncharacterized protein                                                                     | Glyoxalase-like domain protein                               | 84           | KMO83754.1        | <i>Mycobacterium chlorophenicum</i>        |
| PD653_1133        | 4              | Enoyl-CoA hydratase (Fragment)                                                              | Putative enoyl-CoA hydratase echA8                           | 69           | KMO83648.1        | <i>Mycobacterium chlorophenicum</i>        |
| PD653_1134        | 5              | Mitomycin radical oxidase                                                                   | Mitomycin radical oxidase                                    | 62           | KMO83755.1        | <i>Mycobacterium chlorophenicum</i>        |
| PD653_1135        | 36             | FAD synthetase                                                                              | Hypothetical protein                                         | 55           | WP_082168625.1    | <i>Mycobacterium chlorophenicum</i>        |
| PD653_1136        | 77             | Uncharacterized protein                                                                     | 3-oxoacyl-[acyl-carrier-protein] reductase FabG              | 77           | KMO66993.1        | <i>Mycobacterium chlorophenicum</i>        |
| PD653_1137        | 36             | Hypothetical protein                                                                        |                                                              |              |                   |                                            |
| PD653_1138        | 23             | Phosphogluconate dehydrogenase (Decarboxylating), NAD binding domain protein                | 2-hydroxy-3-oxopropionate reductase                          | 73           | KMO66992.1        | <i>Mycobacterium chlorophenicum</i>        |
| PD653_1139        | 22             | Alkylhydroperoxidase AhpD family core domain                                                | Carboxymuconolactone decarboxylase family protein            | 71           | KMO66991.1        | <i>Mycobacterium chlorophenicum</i>        |
| PD653_1140        | 8              | Putative regulatory protein                                                                 | HTH-type transcriptional regulator MalT                      | 46           | KMO66963.1        | <i>Mycobacterium chlorophenicum</i>        |
| PD653_1141        | 1              | Esterase/lipase                                                                             | Carboxylesterase NlhH                                        | 74           | KMO67023.1        | <i>Mycobacterium chlorophenicum</i>        |
| PD653_1142        | 1              | CleR                                                                                        | MULTISPECIES: LysR family transcriptional regulator          | 99           | WP_085870507.1    | <i>Nocardioides</i>                        |
| PD653_1143        | 1              | UspA domain-containing protein                                                              | Nucleotide-binding universal stress protein, UspA family     | 56           | SHG98930.1        | <i>Jatrophihabitans endophyticus</i>       |

|            |    |                                                                   |                                                                                       |    |            |                                        |
|------------|----|-------------------------------------------------------------------|---------------------------------------------------------------------------------------|----|------------|----------------------------------------|
| PD653_1144 | 3  | Glutathione S-transferase                                         | Glutathione S-transferase                                                             | 85 | KQW47837.1 | <i>Nocardioides</i> sp. Root1257       |
| PD653_1145 | 10 | Oxidoreductase                                                    | Putative N5,N10-methylenetetrahydromethanopterin reductase                            | 74 | EGD43879.1 | <i>Nocardioideae</i> bacterium Broad-1 |
| PD653_1156 | 4  | Dihydrolipoamide dehydrogenase                                    | Dihydrolipoamide dehydrogenase                                                        | 69 | CND52706.1 | <i>Mycobacterium tuberculosis</i>      |
| PD653_1157 | 5  | NAD-dependent aldehyde dehydrogenase                              | Succinate semialdehyde dehydrogenase                                                  | 75 | CND52739.1 | <i>Mycobacterium tuberculosis</i>      |
| PD653_1158 | 8  | Pyruvate dehydrogenase                                            | pyruvate/2-oxoglutarate dehydrogenase complex%2C dehydrogenase component beta subunit | 82 | CND52779.1 | <i>Mycobacterium tuberculosis</i>      |
| PD653_1159 | 8  | Pyruvate dehydrogenase complex dihydrolipoamide acetyltransferase | Dihydrolipoamide acetyltransferase component of pyruvate dehydrogenase complex        | 54 | GAY07691.1 | <i>Pseudonocardia</i> sp. N23          |
| PD653_1160 | 6  | Uncharacterized protein                                           |                                                                                       |    |            |                                        |
| PD653_1161 | 4  | NAD-dependent malic enzyme                                        | Malate dehydrogenase                                                                  | 77 | OEV38320.1 | <i>Kitasatospora aureofaciens</i>      |

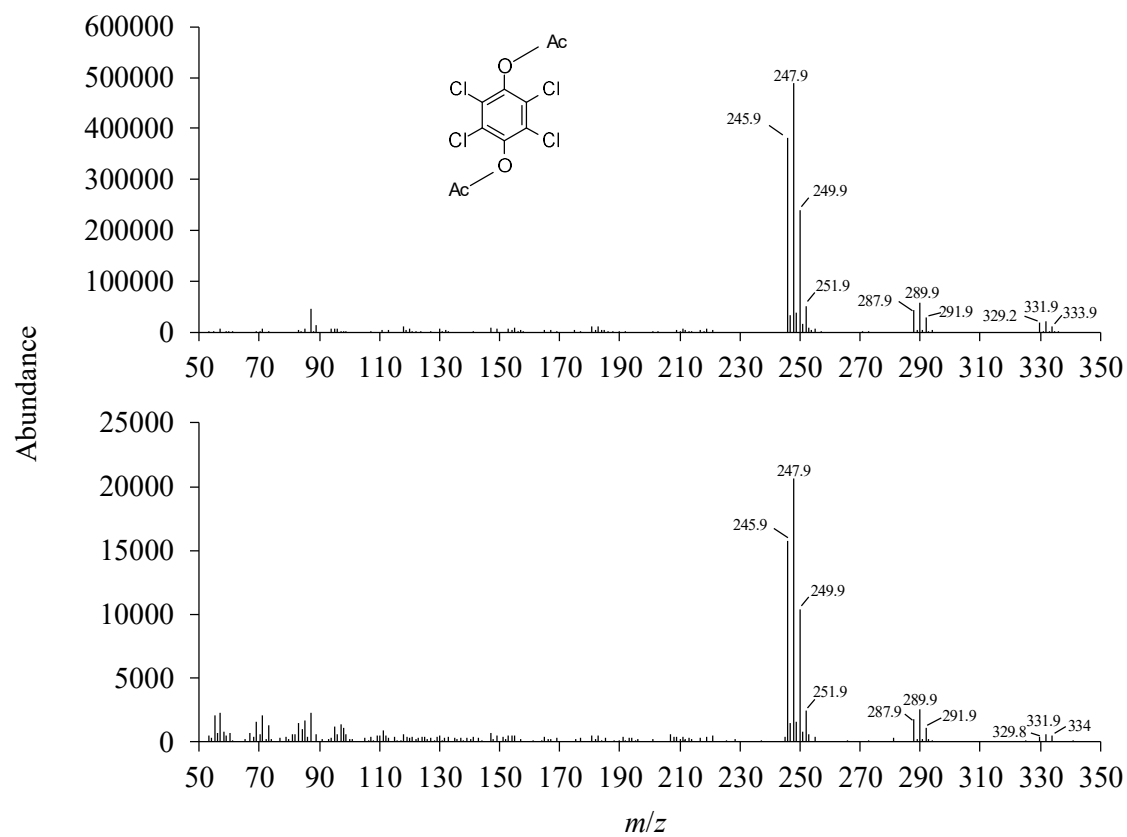

**Fig. S2 GC-MS spectrum of a standard sample of acetylated TeCH (Top) and an acetylated metabolite (bottom) in the degradation of PCP.**

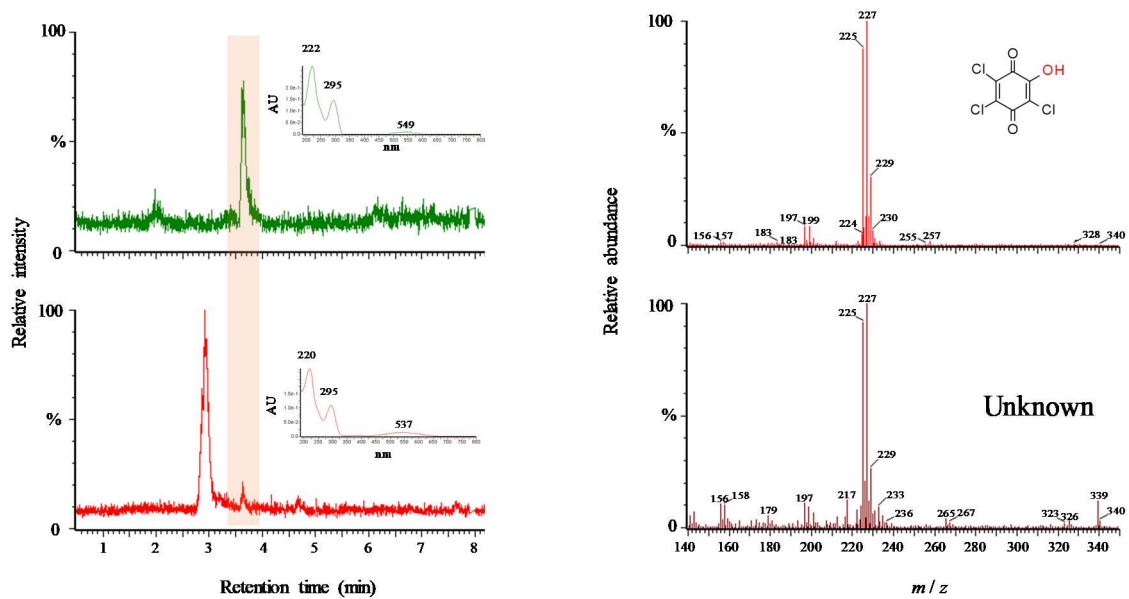

**Fig. S3 UPLC-MS chromatogram (left) with UV-visible spectrum and the MS spectrum (right) for synthesized TCHQ (top), and those of the sample solution at 1 h (bottom) are shown.**
